# Supplementary material for: Evaluation of the genetic risk for COVID-19 outcomes in COPD and differences among worldwide populations
Source: PubMed Central journal article supplement (PMC8865687; doi:10.1371/journal.pone.0264009), 2022-02-23
Supplement: pone.0264009.s002.pdf [file pone.0264009.s002.pdf]

**S1 Table. COVID-19 associated SNPs description.** Ref. allele - reference allele. Alt. allele - alternative allele. A - adenine. C - cytosine. G - guanine. T - thymine. dupA - duplication of an adenine. V - valine. M - Methionine.

| SNP        | Position       | Ref. allele | Alt. allele | Aminoacid alteration | Gene : Consequence         | Clinical Significance   |
|------------|----------------|-------------|-------------|----------------------|----------------------------|-------------------------|
| rs286914   | chr11:34653124 | G           | A           | No alteration        | EHF : Intron Variant       | Not Reported in ClinVar |
| rs12329760 | chr21:41480570 | C           | T           | V [GTG] > M [ATG]    | TMPRSS2 : Missense Variant | Not Reported in ClinVar |
| rs657152   | chr9:136139265 | A           | C,T         | No alteration        | ABO : Intron Variant       | Not Reported in ClinVar |
| rs11385942 | chr3:45876461  | A           | dupA        | No alteration        | LZTFL1 : Intron Variant    | Not Reported in ClinVar |
