# Supplementary material for: Evaluation of the genetic risk for COVID-19 outcomes in COPD and differences among worldwide populations
Source: PubMed Central journal article supplement (PMC8865687; doi:10.1371/journal.pone.0264009), 2022-02-23
Supplement: pone.0264009.s003.pdf [file pone.0264009.s003.pdf]

**S2 Table. Probability formula of having multiple risk alleles, assuming the Hardy-Weinberg's law.**

SNP X and SNP Y are representative.  $p^2$  - major allele in homozygosity probability;  $2pq$  - heterozygosity probability;  $q^2$  - minor allele in homozygosity probability.

|       |       | SNP Y           |                 |                 |
|-------|-------|-----------------|-----------------|-----------------|
|       |       | $p^2$           | $2pq$           | $q^2$           |
| SNP X | $p^2$ | prob. 0 alleles | prob. 1 allele  | prob. 2 alleles |
|       | $2pq$ | prob. 1 allele  | prob. 2 alleles | prob. 3 alleles |
|       | $q^2$ | prob. 2 alleles | prob. 3 alleles | prob. 4 alleles |
