# Supplementary material for: Evaluation of the genetic risk for COVID-19 outcomes in COPD and differences among worldwide populations
Source: PubMed Central journal article supplement (PMC8865687; doi:10.1371/journal.pone.0264009), 2022-02-23
Supplement: pone.0264009.s004.pdf [file pone.0264009.s004.pdf]

**S3 Table. Sociodemographic, anthropometric and clinical characteristics of the Minho cohort. N (%)**

- number of individuals and corresponding percentage; remaining data is presented as medians with interquartile range in square brackets. FEV<sub>1</sub> - Forced Expiratory Volume in 1-sec in litres; FVC - Forced Vital Capacity in litres; n.d. - no data available.

| Characteristics                      | Minho               |
|--------------------------------------|---------------------|
|                                      | Healthy (n=380)     |
| Age (years)                          | 66 [53, 72]         |
| Gender (Male), n (%)                 | 183 (48.2%)         |
| Body mass Index (Kg/m <sup>2</sup> ) | 27.65 [25.1, 30.45] |
| FEV <sub>1</sub> (Litres)            | n.d.                |
| FEV <sub>1</sub> /FVC                | n.d.                |
