# Supplementary material for: Evaluation of the genetic risk for COVID-19 outcomes in COPD and differences among worldwide populations
Source: PubMed Central journal article supplement (PMC8865687; doi:10.1371/journal.pone.0264009), 2022-02-23
Supplement: pone.0264009.s005.pdf [file pone.0264009.s005.pdf]

**S4 Table. Single-loci frequency comparison between European and the other world populations. SNP**

- single nucleotide polymorphism; CHR:POS - genomic coordinates; N -total number of individuals enrolled in the study; A1 - effect allele; A2 - reference allele; A1F - Average effect allele frequency; A2F - Average reference allele frequency. Data source: rs286914, rs12329760 and rs11385942 - gnomAD-Genome project7; rs657152 - ALFA project6.

| Study Population | SNP        | CHR:POS        | N     | A1 | A2 | A1F   | A2F   | p-value |
|------------------|------------|----------------|-------|----|----|-------|-------|---------|
| European         | rs286914   | chr11:34653124 | 18876 | A  | G  | 26.81 | 73.19 | -----   |
| Portuguese       |            |                | 623   | A  | G  | 31.95 | 68.05 | <0.0001 |
| African          |            |                | 8682  | A  | G  | 38.01 | 61.99 | <0.0001 |
| American         |            |                | 846   | A  | G  | 35.9  | 64.1  | <0.0001 |
| East Asian       |            |                | 1560  | A  | G  | 13.14 | 86.86 | <0.0001 |
| European         | rs12329760 | chr21:42852497 | 18848 | T  | C  | 27.23 | 72.77 | -----   |
| Portuguese       |            |                | 623   | T  | C  | 18.74 | 81.26 | <0.0001 |
| African          |            |                | 8694  | T  | C  | 28.84 | 71.16 | <0.0001 |
| American         |            |                | 848   | T  | C  | 17.2  | 82.8  | <0.0001 |
| East Asian       |            |                | 1558  | T  | C  | 41.72 | 58.28 | <0.0001 |
| European         | rs657152   | chr9:136139265 | 82068 | A  | C  | 37.09 | 62.91 | -----   |
| Portuguese       |            |                | 623   | A  | C  | 42.14 | 57.86 | <0.0001 |
| Spanish          |            |                | 9761  | A  | C  | 37.41 | 62.59 | 0.383   |
| Italian          |            |                | 6363  | A  | C  | 38.43 | 61.57 | 0.0025  |
| African          |            |                | 2886  | A  | C  | 45.08 | 54.92 | <0.0001 |
| American         |            |                | 4098  | A  | C  | 22.65 | 77.35 | <0.0001 |
| East Asian       |            |                | 18    | A  | C  | 72    | 28    | <0.0001 |
| European         | rs11385942 | chr3:45876459  | 18896 | GA | G  | 7.87  | 92.13 | -----   |
| Portuguese       |            |                | 243   | GA | G  | 5.82  | 94.18 | 0.0594  |
| Spanish          |            |                | 9761  | GA | G  | 6     | 94    | <0.0001 |
| Italian          |            |                | 6363  | GA | G  | 10.33 | 89.67 | <0.0001 |
| African          |            |                | 8704  | GA | G  | 5.76  | 94.24 | <0.0001 |
| American         |            |                | 846   | GA | G  | 5.8   | 94.2  | 0.0018  |
| East Asian       |            |                | 1560  | GA | G  | 0.06  | 99.94 | <0.0001 |
