# Supplementary material for: Evaluation of the genetic risk for COVID-19 outcomes in COPD and differences among worldwide populations
Source: PubMed Central journal article supplement (PMC8865687; doi:10.1371/journal.pone.0264009), 2022-02-23
Supplement: pone.0264009.s006.pdf [file pone.0264009.s006.pdf]

**S5 Table. Estimation on the number of people with a cumulative number of risk alleles in the world major populations, for susceptibility to COVID-19 infection (rs286914 + rs12329760).** 0 to 4 represent the sum of effect alleles. Data for the Portuguese population correspond to observed values (n=623) extrapolated to 1 million, whereas data for major world populations correspond to estimations (also to 1 million) based on the published effect allele frequencies, after Hardy-Weinberg equilibrium validation. Allele frequencies were obtained from gnomAD-Genome project<sup>7</sup>.

|            |            | Risk   |        |        |       |       |
|------------|------------|--------|--------|--------|-------|-------|
|            |            | 0      | 1      | 2      | 3     | 4     |
| Population | European   | 283667 | 420110 | 233310 | 57584 | 5330  |
|            | Portuguese | 295804 | 426664 | 223339 | 50112 | 4081  |
|            | Spanish    | -----  | -----  | -----  | ----- | ----- |
|            | Italian    | -----  | -----  | -----  | ----- | ----- |
|            | African    | 194588 | 396354 | 298545 | 98496 | 12017 |
|            | American   | 281693 | 432564 | 231605 | 50325 | 3813  |
|            | Asian      | 256259 | 444421 | 248188 | 48128 | 3005  |
