# Supplementary material for: Evaluation of the genetic risk for COVID-19 outcomes in COPD and differences among worldwide populations
Source: PubMed Central journal article supplement (PMC8865687; doi:10.1371/journal.pone.0264009), 2022-02-23
Supplement: pone.0264009.s007.pdf [file pone.0264009.s007.pdf]

**S6 Table. Estimation on the number of people with a cumulative number of risk alleles in the world major populations for severe COVID-19 with respiratory failure (rs657152 + rs11385942).** 0 to 4 represent the sum of effect alleles. Data for the Portuguese(n=623), Spanish (n=9761) and Italian (6363) populations correspond to observed values extrapolated to 1 million, whereas data for major world populations correspond to estimations (also to 1 million) based on the published effect allele frequencies, after Hardy-Weinberg equilibrium validation. Allele frequencies for rs11385942 were obtained from gnomAD-Genome project<sup>7</sup>, while rs657152 allele frequencies were obtained from the ALFA project<sup>6</sup>.

|            |            | Risk   |        |        |       |      |
|------------|------------|--------|--------|--------|-------|------|
|            |            | 0      | 1      | 2      | 3     | 4    |
| Population | European   | 335924 | 453495 | 186890 | 22839 | 852  |
|            | Portuguese | 292834 | 470920 | 215022 | 20660 | 564  |
|            | Spanish    | 346151 | 457978 | 177895 | 17472 | 504  |
|            | Italian    | 304812 | 450737 | 210465 | 32410 | 1576 |
|            | African    | 267875 | 472505 | 235241 | 23705 | 674  |
|            | American   | 530912 | 376306 | 85825  | 6785  | 173  |
|            | Asian      | 78306  | 402810 | 518262 | 622   | 0    |
